# Supplementary material for: Human ALS/FTD brain organoid slice cultures display distinct early astrocyte and targetable neuronal pathology
Source: PubMed Central journal article supplement (PMC8553627; doi:10.1038/s41593-021-00923-4), 2021-10-21
Supplement: 41593_2021_923_MOESM2_ESM.pdf [file 41593_2021_923_MOESM2_ESM.pdf]

## Reporting Summary

Nature Research wishes to improve the reproducibility of the work that we publish. This form provides structure for consistency and transparency in reporting. For further information on Nature Research policies, see our [Editorial Policies](#) and the [Editorial Policy Checklist](#).

### Statistics

For all statistical analyses, confirm that the following items are present in the figure legend, table legend, main text, or Methods section.

n/a Confirmed

- The exact sample size ( $n$ ) for each experimental group/condition, given as a discrete number and unit of measurement
- A statement on whether measurements were taken from distinct samples or whether the same sample was measured repeatedly
- The statistical test(s) used AND whether they are one- or two-sided  
*Only common tests should be described solely by name; describe more complex techniques in the Methods section.*
- A description of all covariates tested
- A description of any assumptions or corrections, such as tests of normality and adjustment for multiple comparisons
- A full description of the statistical parameters including central tendency (e.g. means) or other basic estimates (e.g. regression coefficient) AND variation (e.g. standard deviation) or associated estimates of uncertainty (e.g. confidence intervals)
- For null hypothesis testing, the test statistic (e.g.  $F$ ,  $t$ ,  $r$ ) with confidence intervals, effect sizes, degrees of freedom and  $P$  value noted  
*Give  $P$  values as exact values whenever suitable.*
- For Bayesian analysis, information on the choice of priors and Markov chain Monte Carlo settings
- For hierarchical and complex designs, identification of the appropriate level for tests and full reporting of outcomes
- Estimates of effect sizes (e.g. Cohen's  $d$ , Pearson's  $r$ ), indicating how they were calculated

*Our web collection on [statistics for biologists](#) contains articles on many of the points above.*

### Software and code

Policy information about [availability of computer code](#)

Data collection MEA data collection was assisted by MC Data Tool, RRID: SCR\_014580, <https://www.multichannelsystems.com/software/mc-datatool>

Data analysis Established open source softwares, plugins or pipelines were used for data analysis, and the details have been provided in the manuscript and also below with full references and/or web links for accessibility. No new codes were developed for data analysis in this study.

CellProfiler Image Analysis Software, 3.1. 9 and 4.0.7, RRID: SCR\_007358, <https://cellprofiler.org/>  
 CellRanger v3.1, <https://support.10xgenomics.com/single-cell-gene-expression/software/release-notes/3-0>  
 Fiji (ImageJ), 2.0.0, RRID: SCR\_002285, <https://fiji.sc/>  
 ImageJ (OpenComet Plugin) SRC V1, RRID:SCR\_001935, <https://fiji.sc/>  
 IncuCyte® NeuroTrack, RRID:SCR\_019874, <https://www.essenbioscience.com/en/products/peripherals/cell-player-neurotrack-software-module/>  
 GraphPad, Version 7.0 or 8.0, RRID:SCR\_002798, <https://www.graphpad.com/>  
 MATLAB, RRID: SCR\_001622, <http://www.mathworks.com/products/matlab/>  
 Monocle3 0.2.3.0 - <https://github.com/cole-trapnell-lab/monocle3>  
 MC Data Tool, RRID: SCR\_014580, <https://www.multichannelsystems.com/software/mc-datatool>  
 Python 3.6, <https://www.python.org/downloads/>  
 R version 4.0.3, RRID:SCR\_001905, <https://www.r-project.org>  
 Seurat 3.1 and 4.0.1, <https://github.com/satijalab/seurat/>  
 Scmap 1.12.0, <https://github.com/hemberg-lab/scmap>  
 SCENIC 0.9.6 <https://github.com/aertslab/SCENIC>  
 WGCNA 1.70-3, <http://horvath.genetics.ucla.edu/html/CoexpressionNetwork/Rpackages/WGCNA/>

For manuscripts utilizing custom algorithms or software that are central to the research but not yet described in published literature, software must be made available to editors and reviewers. We strongly encourage code deposition in a community repository (e.g. GitHub). See the Nature Research [guidelines for submitting code & software](#) for further information.

## Data

Policy information about [availability of data](#)

All manuscripts must include a [data availability statement](#). This statement should provide the following information, where applicable:

- Accession codes, unique identifiers, or web links for publicly available datasets
- A list of figures that have associated raw data
- A description of any restrictions on data availability

1. scRNA-seq data that support the findings have been deposited in the GEO database (accession code: GSE180122).
2. The figures with associated raw data (GEO and Supplementary Data Files 1-5) include Figures 1-3, Extended Data Figures 1-3, Supplementary Figure 3.
3. Data is also available from the corresponding authors.

## Field-specific reporting

Please select the one below that is the best fit for your research. If you are not sure, read the appropriate sections before making your selection.

- Life sciences       Behavioural & social sciences       Ecological, evolutionary & environmental sciences

For a reference copy of the document with all sections, see [nature.com/documents/nr-reporting-summary-flat.pdf](https://www.nature.com/documents/nr-reporting-summary-flat.pdf)

## Life sciences study design

All studies must disclose on these points even when the disclosure is negative.

|                 |                                                                                                                                                                                                                                                                                                                                                                                                                                                                                                                                                                                                                              |
|-----------------|------------------------------------------------------------------------------------------------------------------------------------------------------------------------------------------------------------------------------------------------------------------------------------------------------------------------------------------------------------------------------------------------------------------------------------------------------------------------------------------------------------------------------------------------------------------------------------------------------------------------------|
| Sample size     | Statistical test details and sample sizes have been summarised in Supplementary Table 3. No sample size calculation was performed. The sample sizes using hiPSC lines and organoids were estimated from previously performed experiments (e.g. Giandomenico et al., Nature Neuroscience (2019); Tyzack et al., Nature communications (2017)). Sample sizes and origins are summarized in Supplementary Table 1 and 3.                                                                                                                                                                                                        |
| Data exclusions | No acquired data was excluded from the statistical analyses. (A few damaged sections/slices were not used for data collection).                                                                                                                                                                                                                                                                                                                                                                                                                                                                                              |
| Replication     | Experiments were repeated three times (or two times for GSK treatments), which included at least 3 independent biological replicates (organoids/cells grown from separate independent batches and/or cell lines), leading to similar results. At least three biological replicates were used for all statistical analyses in biological experiments.                                                                                                                                                                                                                                                                         |
| Randomization   | The in vitro experiments were not fully randomized. Sample allocations into groups included independent organoids, ALI-COs or immersed CO slices grown from different cell lines and/or as separate batches (independent biological replicates). Batches of organoids were randomly selected from each cell line-group. ALI-COs or immersed CO slices deriving from identical whole organoids were only used in separate studies or as adequate control-treatment slice-pairs for each independent biological replicate. No randomization was used for cell culture experiments using non-differentiated cultures of hiPSCs. |
| Blinding        | For analysis the subjects were blinded for the observers. This involved masking original sample identification and assigning coded IDs before data collection.                                                                                                                                                                                                                                                                                                                                                                                                                                                               |

## Reporting for specific materials, systems and methods

We require information from authors about some types of materials, experimental systems and methods used in many studies. Here, indicate whether each material, system or method listed is relevant to your study. If you are not sure if a list item applies to your research, read the appropriate section before selecting a response.

### Materials & experimental systems

| n/a                                 | Involved in the study                                     |
|-------------------------------------|-----------------------------------------------------------|
| <input type="checkbox"/>            | <input checked="" type="checkbox"/> Antibodies            |
| <input type="checkbox"/>            | <input checked="" type="checkbox"/> Eukaryotic cell lines |
| <input checked="" type="checkbox"/> | <input type="checkbox"/> Palaeontology and archaeology    |
| <input checked="" type="checkbox"/> | <input type="checkbox"/> Animals and other organisms      |
| <input checked="" type="checkbox"/> | <input type="checkbox"/> Human research participants      |
| <input checked="" type="checkbox"/> | <input type="checkbox"/> Clinical data                    |
| <input checked="" type="checkbox"/> | <input type="checkbox"/> Dual use research of concern     |

### Methods

| n/a                                 | Involved in the study                           |
|-------------------------------------|-------------------------------------------------|
| <input checked="" type="checkbox"/> | <input type="checkbox"/> ChIP-seq               |
| <input checked="" type="checkbox"/> | <input type="checkbox"/> Flow cytometry         |
| <input checked="" type="checkbox"/> | <input type="checkbox"/> MRI-based neuroimaging |

## Antibodies

Antibodies used      The details of all antibodies are provided below with validation references, and are also listed in Supplementary Table 2.

Antibody details, Catalogue number, validation references:

Rabbit anti-53BP1, Novus NB100-304

[https://www.novusbio.com/products/53bp1-antibody\\_nb100-304](https://www.novusbio.com/products/53bp1-antibody_nb100-304)

Mouse anti-ACTB-HRP, Proteintech HRP-60008

RRID:AB\_2819183

Rabbit anti-AQP4, Millipore Sigma HPA014784

RRID:AB\_1844967

Mouse anti-βIII-tubulin, Abcam ab78078

RRID:AB\_2256751

Chicken anti-βIII-tubulin, Merck AB9354

RRID:AB\_570918

Rat anti-CTIP2, Abcam ab18465

RRID:AB\_2064130/ AB\_10015215

Rabbit anti-EIF2a, New England Biolabs 9722

RRID:AB\_2230924/AB\_10695409

Rabbit anti-p-EIF2a, New England Biolabs 9721

RRID:AB\_330951/AB\_330952

Rabbit anti-FOXG1, Abcam ab18259

[https://www.abcam.com/FOXG1-antibody-ab18259.html?gclid=aw.ds|aw.ds&gclid=CjwKCAjw55-HBhAHEiwARMCszubMZRSiz-G0r2DZe4OZnI7\\_SlDmRsM9KjgWutq9Jl66pcXN3e9HShoC2CMQAvD\\_BwE](https://www.abcam.com/FOXG1-antibody-ab18259.html?gclid=aw.ds|aw.ds&gclid=CjwKCAjw55-HBhAHEiwARMCszubMZRSiz-G0r2DZe4OZnI7_SlDmRsM9KjgWutq9Jl66pcXN3e9HShoC2CMQAvD_BwE)

Mouse anti-GAD65, Abcam ab26113

<https://pubmed.ncbi.nlm.nih.gov/31298263/>

Mouse anti-GFAP, Millipore Sigma G6171

RRID:AB\_1840893

Rabbit anti-GFAP, Abcam ab7260

<https://www.abcam.com/gfap-antibody-ab7260.html>

Chicken anti-GFAP, Antibodies.com A85307

RRID:AB\_2748894

Mouse anti-γ-H2AX, Millipore 05-636

RRID:AB\_309864

Mouse anti-HepaCAM, R&D Systems MAB4108

RRID:AB\_2117687

Rabbit anti-HOMER1, Synaptic Systems Cat# 160 003

RRID:AB\_887730

Rabbit anti-HOPX, Millipore Sigma HPA030180

RRID:AB\_10603770

Rabbit anti-LC3, Abcam ab192890

RRID:AB\_2827794

Chicken anti-MAP2, Abcam ab5392

<https://www.abcam.com/map2-antibody-ab5392.html>

Mouse anti-NESTIN, Abcam ab22035

RRID:AB\_446723

Rabbit anti-NEUN, Millipore Sigma ABN78

RRID:AB\_10807945

Mouse anti-NEUN, Abcam ab104224

RRID:AB\_10711040

Rabbit anti-PABP1, Cell Signaling Technology 4992

RRID: AB\_10693595/AB\_2156887

Rabbit anti-POLY(GA), Proteintech 24492-1-AP

RRID:AB\_2879571

Mouse anti-SATB2, Abcam ab5150

RRID:AB\_91701

Goat anti-SOX2, Santa Cruz sc-17320

<https://pubmed.ncbi.nlm.nih.gov/24178749/>

Rabbit anti-SOX9, Millipore Sigma AB5535

RRID:AB\_2239761

Mouse anti-SQSTM1/P62, Abcam ab5641

RRID:AB\_2747598

Mouse anti-SYT1, Synaptic Systems 105 011

RRID:AB\_2619761

Goat Anti-Rabbit IgG-HRP, ThermoFisher 31462

RRID:AB\_228338

Goat Anti-Mouse IgG-HRP, Vector Laboratories Inc. PI-2000

<https://vectorlabs.com/peroxidase-horse-anti-mouse-igg-antibody.html#biozbadges>

Donkey Anti-Goat Alexa Fluor-488, ThermoFisher A11055

RRID:AB\_2534102

Goat Donkey Anti-Mouse Alexa Fluor-568, ThermoFisher A10037

RRID:AB\_2534013

Goat Anti-Mouse Alexa Fluor-568, ThermoFisher A11031

RRID:AB\_144696

Goat Anti-Rabbit Alexa Fluor-568, ThermoFisher A11036

RRID:AB\_10563566

Goat Anti-Rabbit Alexa Fluor-488, ThermoFisher A11008

RRID:AB\_143165

Goat Anti-Mouse Alexa Fluor-488, ThermoFisher A11029

RRID:AB\_2534088  
Goat Anti-Rat Alexa Fluor-568, Abcam ab175710  
RRID:AB\_2832918  
Goat Anti-Chicken Alexa Fluor-647, ThermoFisher A32933  
RRID:AB\_2762845  
Goat Anti-Rabbit Alexa Fluor-647, Abcam ab150083  
RRID: AB\_2714032

## Eukaryotic cell lines

Policy information about [cell lines](#)

Cell line source(s)

All cell line sources and details are listed in Supplementary Table 1.

Authentication

The genotype/hexanucleotide repeat length were tested and cross-checked for the cell lines against the information provided by the company. The Southern blot image and PCR fragment analysis are included in Extended Data Figure 1.

Mycoplasma contamination

Media from cell lines were randomly tested for Mycoplasma in our laboratory, and there has been no evidence for contamination by Mycoplasma.

Commonly misidentified lines  
(See [ICLAC](#) register)

No commonly misidentified cell lines were used.
