# Supplementary material for: Human ALS/FTD brain organoid slice cultures display distinct early astrocyte and targetable neuronal pathology
Source: PubMed Central journal article supplement (PMC8553627; doi:10.1038/s41593-021-00923-4), 2021-10-21
Supplement: 41593_2021_923_MOESM19_ESM.pdf [file 41593_2021_923_MOESM19_ESM.pdf]

**a** MARKER (M) OVERLAY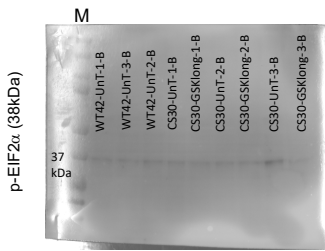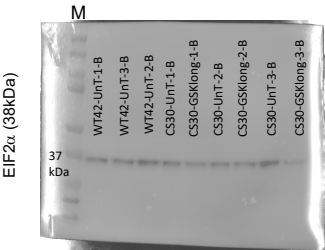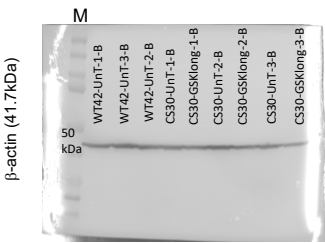

## UNCROPPED BLOT

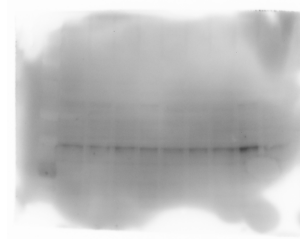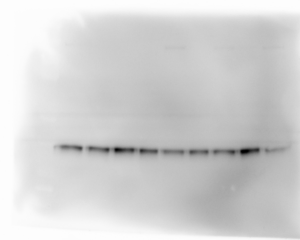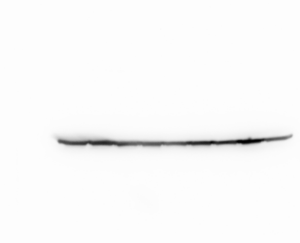**b** MARKER (M) OVERLAY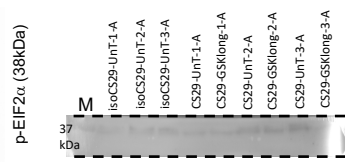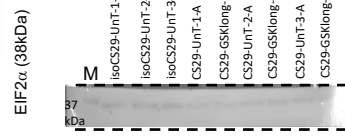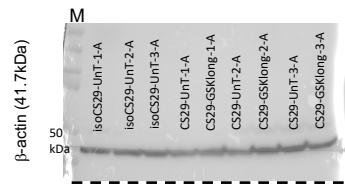

## UNCROPPED BLOT

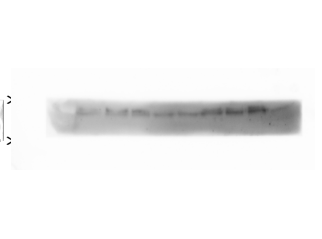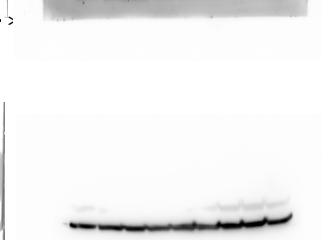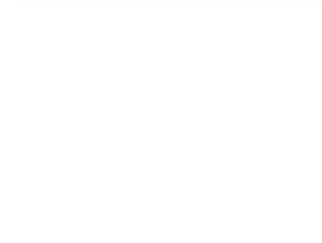

**Source Data Extended Data Figure 6** | Uncropped western blot (WB) scans (right; luminescence channel) and their overlays with molecular weight markers (left; light channel) for Extended Data Fig. 6a,b. Sample labels refer to hiPSC-derived organoid line codes (see Supplementary Table 1) followed by batch codes. Dashed lines indicate blot membrane cuts that enabled simultaneous detection of multiple proteins in the same sample.
